# Supplementary material for: Antibacterial hydrogels of aromatic tripeptides
Source: Royal Society of Chemistry journal article supplement (doi:10.1039/d2sm00606e), 2022-01-01
Supplement: d2sm00606e1.pdf [file d2sm00606e1.pdf]

## Electronic Supporting Information

### Antibacterial Hydrogels of Aromatic Tripeptides

Vivek Prakash,<sup>a</sup> Yvonne Christian,<sup>a</sup> Amay Sanjay Redkar,<sup>a</sup> Abhishek Roy,<sup>b</sup> R. Anandalakshmi,<sup>b</sup>  
Vibin Ramakrishnan<sup>\*a</sup>

<sup>a</sup> Molecular Informatics and Design Laboratory, Department of Biosciences and Bioengineering, Indian Institute of Technology Guwahati, Assam 781039, India.

E-mail: vibin@iitg.ac.in

<sup>b</sup> Advanced Energy & Materials Systems Laboratory, Department of Chemical Engineering, Indian Institute of Technology Guwahati, Assam 781039, India

#### Index

| S.No. | Contents                                                                | Page No. |
|-------|-------------------------------------------------------------------------|----------|
| 1     | Design, Synthesis and Characterization of peptides                      | 2        |
| 2     | Characterization of hydrogel formation                                  | 3        |
| 3     | Table S1. Determination of gelation concentration for peptide hydrogels | 4        |
| 4     | Table S2. Effect of pH on gelation                                      | 4        |
| 5     | Spread plate method                                                     | 6        |

## 1. Design, Synthesis and Characterization of peptides

### (A) HPLC chromatogram

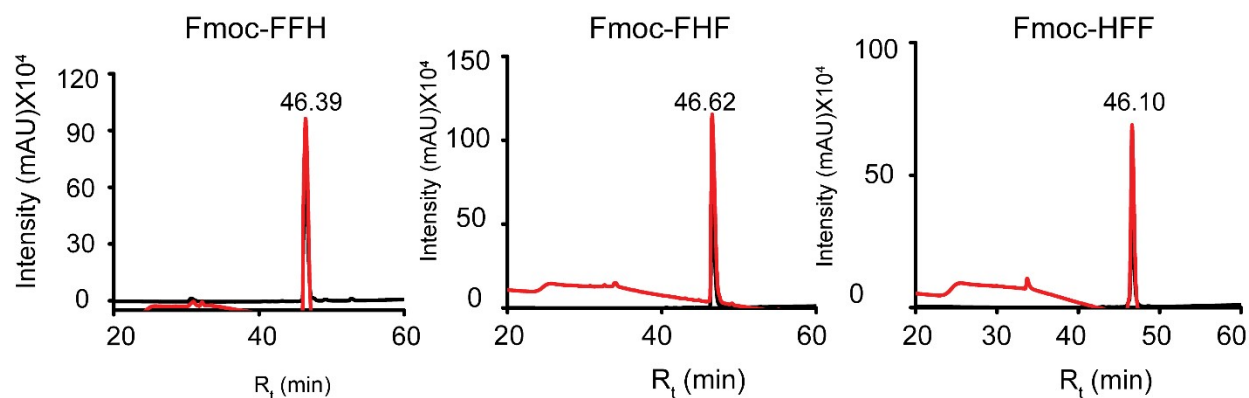

### (B) MALDI/TOF chromatogram

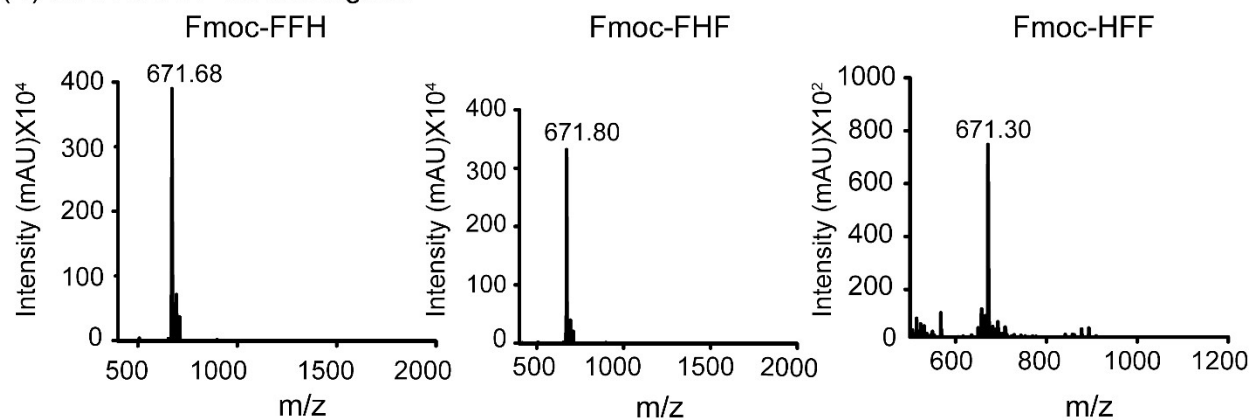

**Fig.S1** Characterization of synthesized peptides; (A) HPLC chromatogram of the synthesized peptide, and (B) Mass spectrum for primary characterization by verifying the mass of the synthesized peptide.

## 2. Characterization of hydrogel formation

Peptides were dissolved in phosphate buffer (pH 7.4) at different concentrations, and gelation was observed by tube inversion test (Fig. S2)

(A) Concentration dependence of gelation

Fmco-FFH

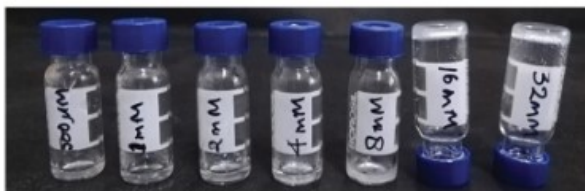

Fmco-FHF

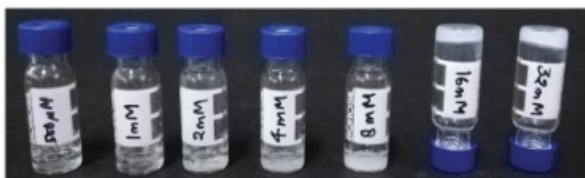

Fmco-HFF

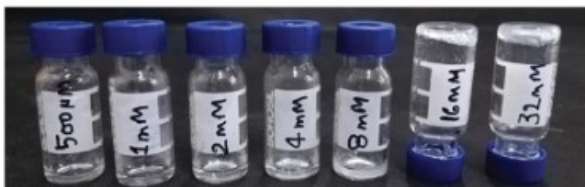

(B) pH optimization for gelation

Fmco-FFH

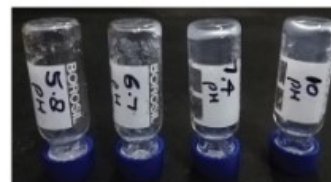

Fmco-FHF

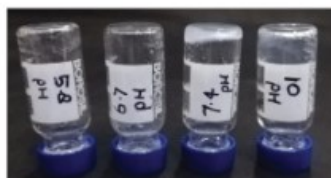

Fmco-HFF

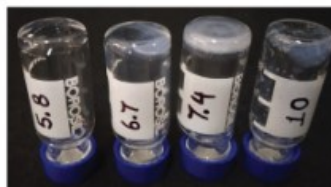

**Fig. S2.** (A) Concentration dependence of hydrogelation and (B) Optimization of pH for hydrogel formation.

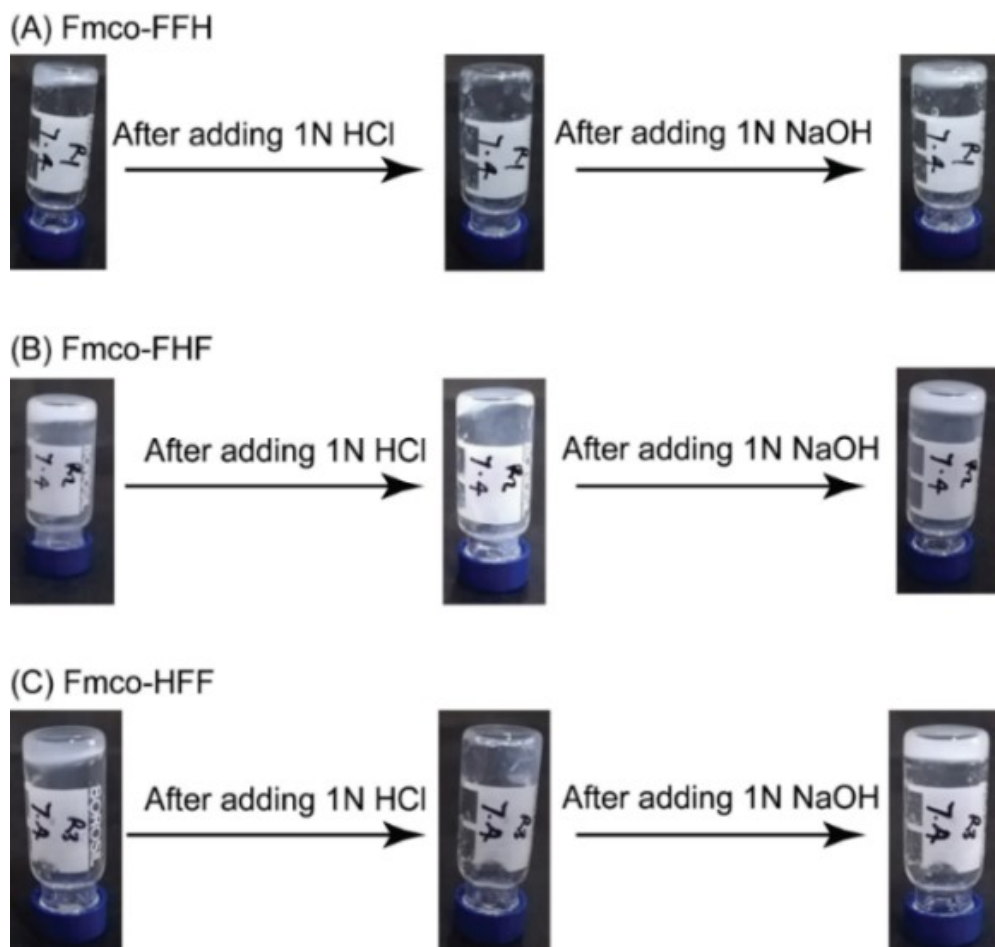

**Fig S3.** Dependence of hydrogelation property with pH switch. Hydrogels lose their gelation property in acidic pH but regained again when switched to basic conditions.

**Table S1.** Determination of gelation concentration for peptide hydrogels

| Concentration | Concentration % (w/v) | Gelation Property       |
|---------------|-----------------------|-------------------------|
| 500 $\mu$ M   | 0.03125%              | No gel formation        |
| 1 mM          | 0.0625%               | No gel formation        |
| 2 mM          | 0.125%                | No gel formation        |
| 4 mM          | 0.25%                 | No gel formation        |
| 8 mM          | 0.5%                  | No gel formation        |
| 16 mM         | 1%                    | Gel formation           |
| 32 mM         | 2%                    | Immediate Gel formation |

**Table S2.** Effect of pH on gelation

| pH  | Gelation Property | Gelation time |
|-----|-------------------|---------------|
| 5.8 | No gel formation  | -             |
| 6.7 | No gel Formation  | -             |
| 7.4 | Gel formation     | Immediate     |
| 10  | Viscous solutions | -             |

## Spread plate method

Spread plate method was used to validate the antibacterial effect of peptides.

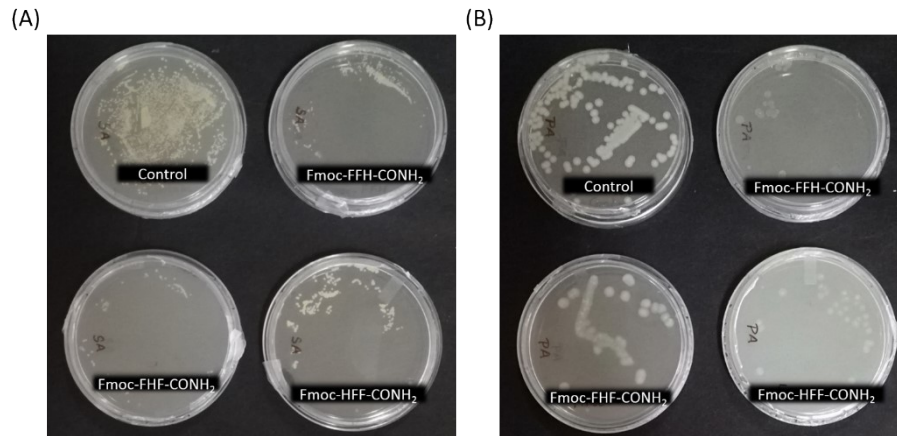

**Fig. S4.** Spread plate method to validate the antibacterial effect of peptides on (A) *Staphylococcus aureus*, (B) *Pseudomonas aeruginosa*
